# Supplementary material for: ATP-dependent motor activity of the transcription termination factor Rho from Mycobacterium tuberculosis
Source: PubMed Central journal article supplement (PMC4499133; doi:10.1093/nar/gkv505), 2015-05-20
Supplement: supp_gkv505_nar-00884-v-2015-File008.pdf [file supp_gkv505_nar-00884-v-2015-File008.pdf]

**ATP-dependent motor activity of the transcription termination factor Rho**

**from *Mycobacterium tuberculosis***

François D'Heygère, Annie Schwartz, Franck Coste, Bertrand Castaing, and Marc

Boudvillain

(Supplementary information)

Address correspondence to M.B. ([marc.boudvillain@cnrs-orleans.fr](mailto:marc.boudvillain@cnrs-orleans.fr))

## **SUPPLEMENTARY METHODS**

*Circular Dichroism.* CD spectra were recorded at 20 °C on a Jasco J-810 spectropolarimeter from 260 to 195 nm using a 1-mm quartz cell, a scan rate of 50 nm/min, a response time of 8 ms, a bandwidth of 1 nm, a resolution of 1 nm, and a protein concentration of 0.1 mg/ml in a buffer containing 10 mM sodium phosphate, pH 7.5 and 100 mM NaCl. Each spectrum represents the average of five scans, with the buffer subtracted.

*Diffusion light scattering.* Hydrodynamic radius measurements were made at 20 °C with a Zetasizer Nano S instrument (Malvern Instruments Ltd, UK) and a protein concentration of 1mg/ml in GF buffer.

**Supplementary Table 1: primers used for plasmid constructs**

| Plasmid                 | Method                                             | Source DNA                     | Forward primer                                                              | Reverse primer                                                                                 |
|-------------------------|----------------------------------------------------|--------------------------------|-----------------------------------------------------------------------------|------------------------------------------------------------------------------------------------|
| pET28b-MtbRho/T501A     | Quickchange <sup>a</sup>                           | pET28b-MtbRho                  | 5'-GTCGAGACCGGGTCCGCTGGTGACACGGTC'                                          | 5'-GACCGTGTACCAGCGGACCCGGTCTCGAC                                                               |
| pET28b-MtbRho/T501K     | Quickchange <sup>a</sup>                           | pET28b-MtbRho                  | 5'-GGTCGAGACCGGGTCCAAAGGTGACACGGTCATTTTC                                    | 5'-GAAAATGACCGTGTACCTTTGGACCCGGTCTCGACC                                                        |
| pET28b-MtbRho/E386A     | Quickchange <sup>a</sup>                           | pET28b-MtbRho                  | 5'-GTGCTCGTCGACGCGCGGCCTGAGGAG                                              | 5'-CTCCTCAGGCCGCGCGTCGACGAGCAC                                                                 |
| pET28b-MtbRho/S461A     | Quickchange <sup>a</sup>                           | pET28b-MtbRho                  | 5'-GGCCGGATCCTGGCCGGTGGTGTCTG                                               | 5'CGACACCACCGGCCAGGATCCGGCC                                                                    |
| pET28b- $\Delta$ MtbRho | 1 [1-75] <sup>b</sup><br>2 [220-602] <sup>b</sup>  | pET28b-MtbRho<br>pET28b-MtbRho | 5'-GGGAATTGTGAGCGGATAAC<br>5'-GGAGATCAGGCGACAGGTACCCGACGACGTCGTCAGCCGG      | 5'-CCGGCTGGACGACGTCGTCGGGTACCTGTCGCTGATCTCC<br>5'-GGCCCCAAGGGGTTATGCTAGTTATTGCTCAGCGGTGGC      |
| pET28b-[Mtb:Ec]Rho      | 1 [1-308] <sup>b</sup><br>2 [131-419] <sup>b</sup> | pET28b-MtbRho<br>pET28b-EcRho  | 5'-GGGAATTGTGAGCGGATAAC<br>5'-CGGTGCAAGACGCCAAGAAGCGGATCCTCTTTGAGAACTTAACCC | 5'-GGGTTAAGTTCTCAAAGAGGATCCGCTTCTTGGCGTCTTCGACCG<br>5'-GGCCCCAAGGGGTTATGCTAGTTATTGCTCAGCGGTGGC |
| pET28b-[Ec:Mtb]Rho      | 1 [1-130] <sup>b</sup><br>2 [309-602] <sup>b</sup> | pET28b-EcRho<br>pET28b-MtbRho  | 5'-GGGAATTGTGAGCGGATAAC<br>5'-CCTGAAAACGCCGCAACAACCCGAGTTCGGCAAACCTGACG     | 5'-CGTCAGTTTGCCGAACCTCGGGTTTGTTCGGGCGTTTTTCAGG<br>5'-GGCCCCAAGGGGTTATGCTAGTTATTGCTCAGCGGTGGC   |

<sup>a</sup> Site-directed mutagenesis using the Quickchange method (Stratagene) and the indicated mutagenic primers.

<sup>b</sup> Overhang extension PCR and standard cloning. Full insert DNA fragments were obtained by fusing the N-terminal fragment 1 to the C-terminal fragment 2 (corresponding Rho amino acids indicated in brackets) by overhang extension PCR. The insert DNA fragments were cloned into the pET28b vector plasmid after digestion of both vector and inserts with the XbaI and XhoI restriction enzymes.



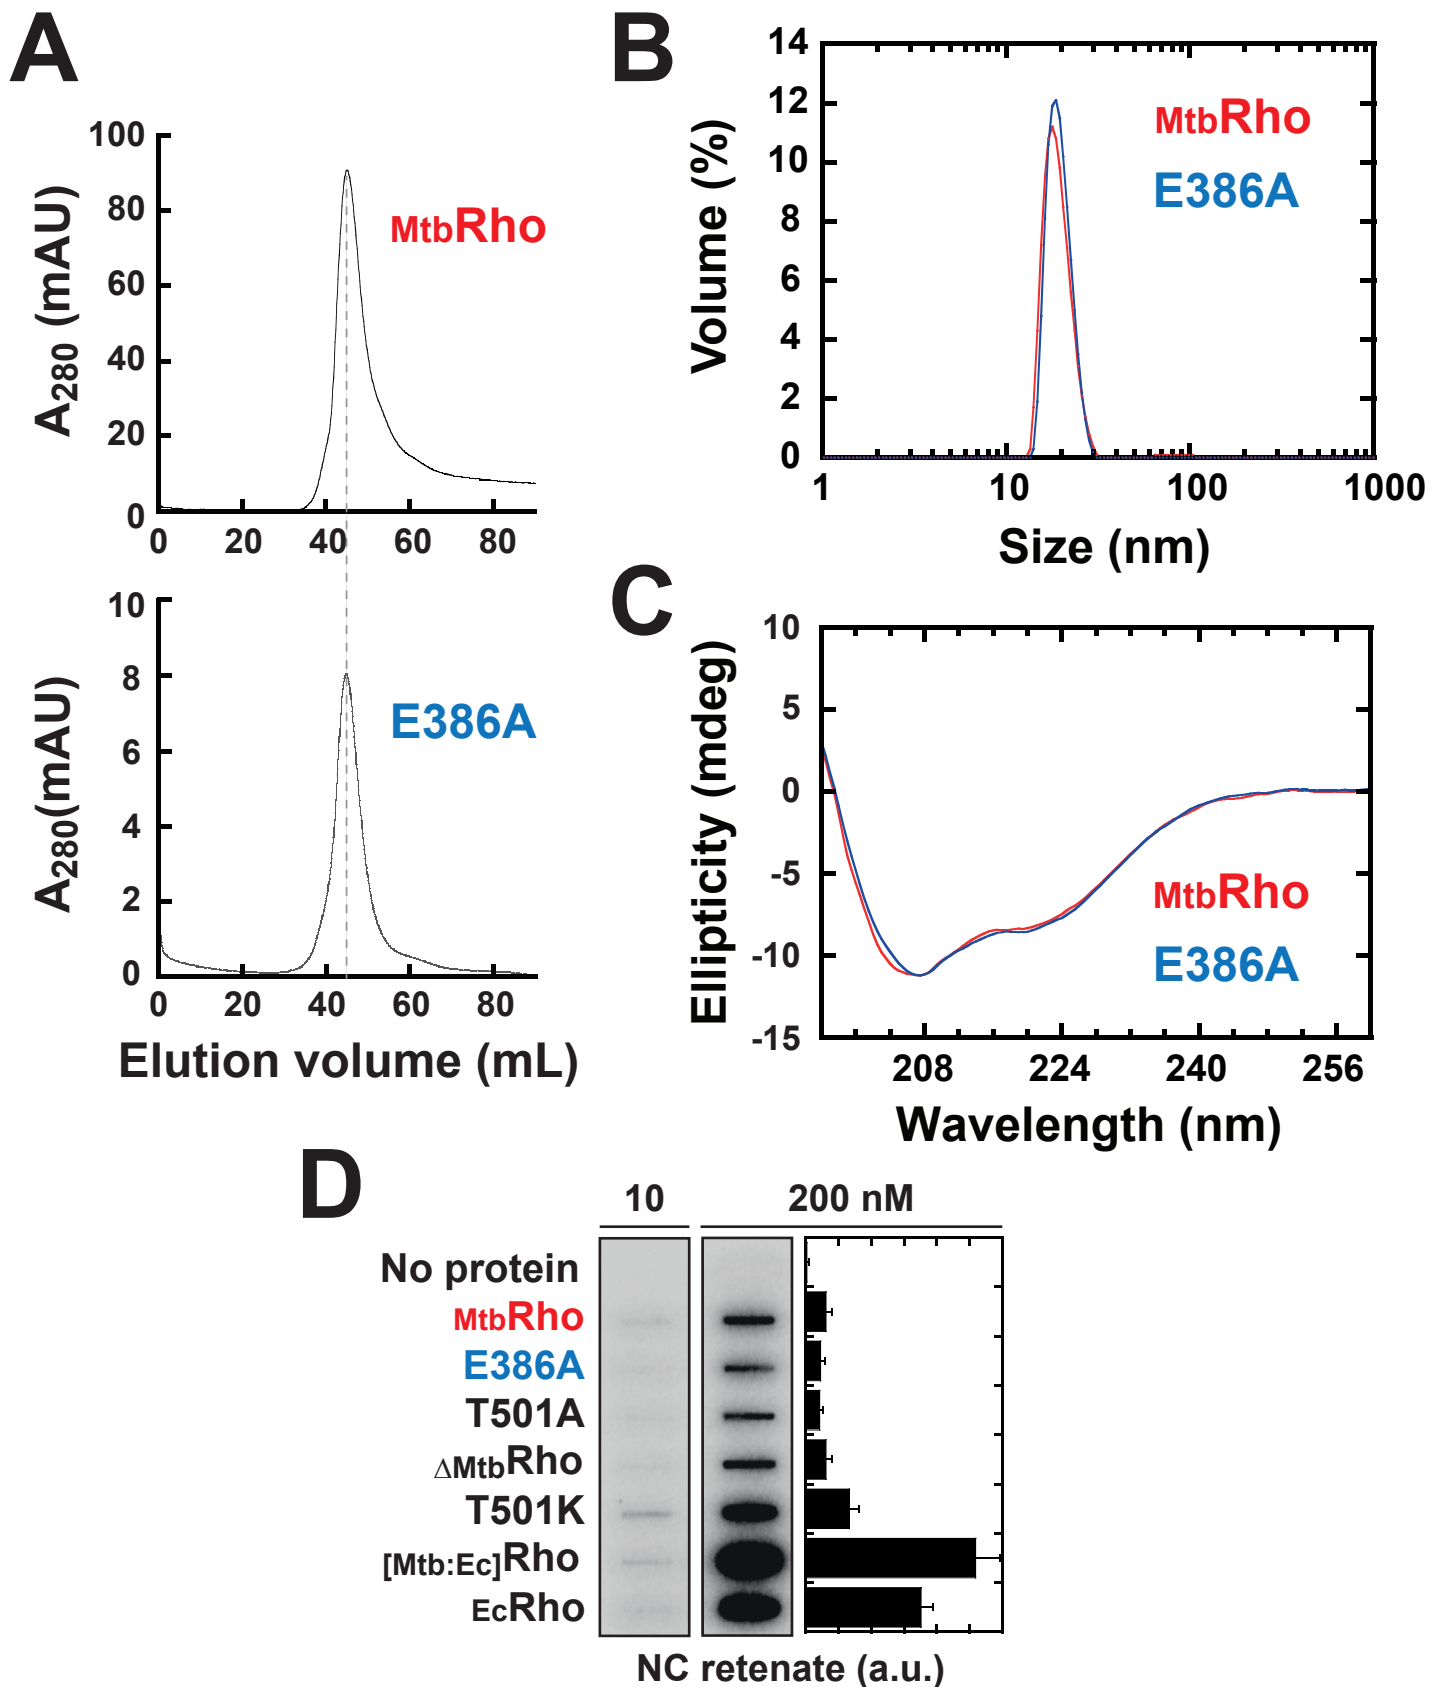

**Supplementary figure 2:** Single-point mutant E386A and WT  $M_{tb}$ Rho have comparable structural, oligomerization, and ATP binding behaviors. **(A)** Chromatograms of the E386A and WT  $M_{tb}$ Rho proteins analyzed by gel filtration on a Sephacryl S-300 HR column. **(B)** Diffusion light scattering and **(C)** circular dichroism spectra of the E386A and WT  $M_{tb}$ Rho proteins. **(D)** Retention of  $[\gamma^{32}P]ATP$ :Rho complexes on a nitrocellulose (NC) membrane. Rho proteins (10 or 200 nM) were incubated with 0.1 nM  $[\gamma^{32}P]ATP$  in helicase buffer supplemented with 1 mM  $MgCl_2$  for 10 min at 30°C before being filtered through a NC membrane using a slot-blot apparatus. Note that the amounts of ATP retained with proteins on the NC membrane are significantly higher for  $E_c$ Rho and  $[M_{tb}:E_c]$ Rho. This suggests that the  $E_c$ Rho motor binds ATP much tighter than the  $M_{tb}$ Rho motor and is consistent with the ~10-fold lower  $K_{m,ATP}$  measured for ATP hydrolysis by  $E_c$ Rho than by  $M_{tb}$ Rho (see main text).

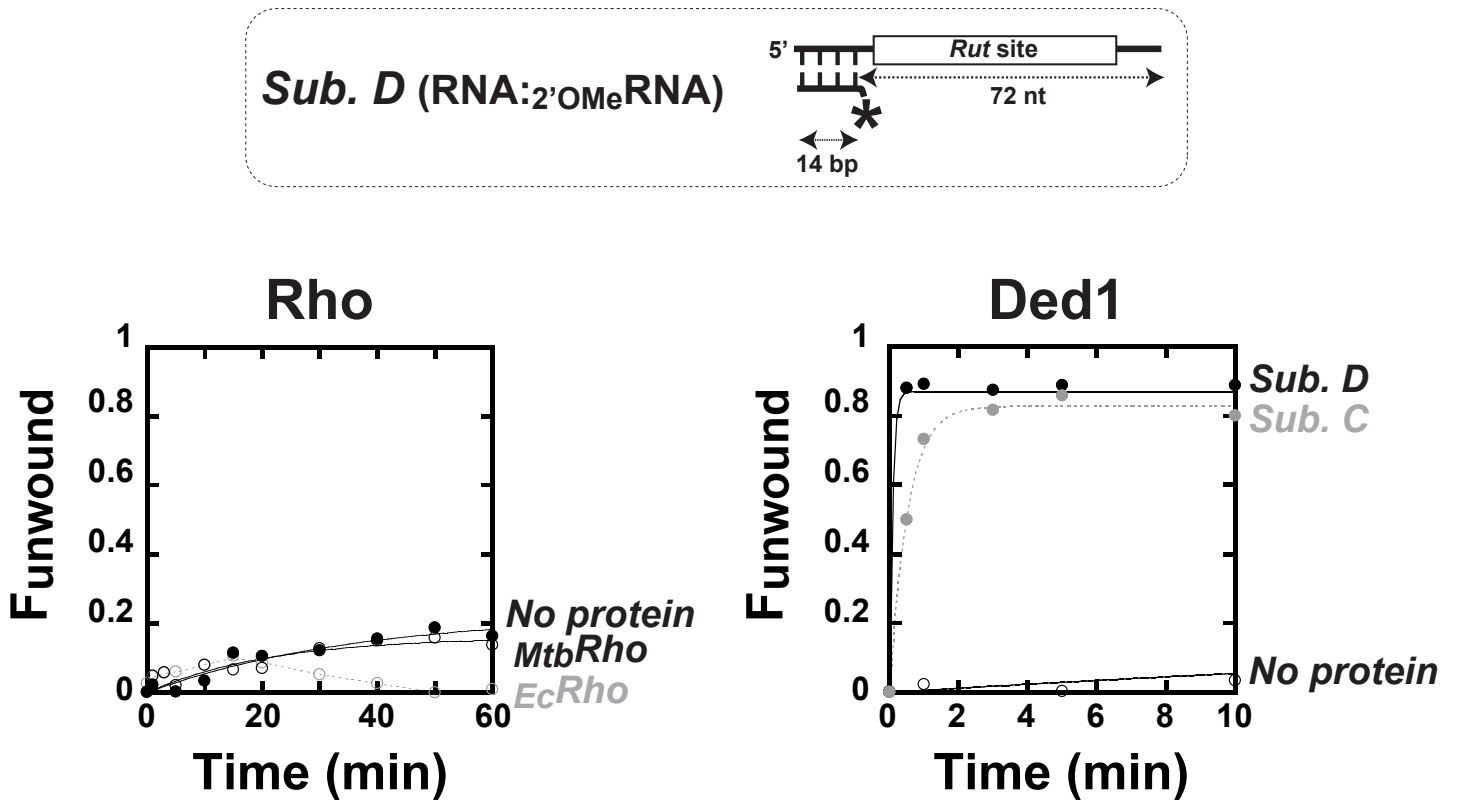

**Supplementary figure 3:** The *MtbRho* enzyme is a directional helicase requiring a 5'-ssRNA tail upstream from its duplex target. Unwinding experiments were performed in the presence of ATP under standard conditions (see methods) with substrate D which contains the same 14bp duplex region than substrate C but located upstream rather than downstream from the ssRNA tail (see diagram, inset). Although the duplex in substrate D is slightly less stable than in substrate C, *MtbRho* does not accelerate duplex unwinding with this substrate (left graph). The same is true for *EcRho* which even displays a slight 'annealing' activity with substrate D as evidenced by a bell-shaped unwinding curve. By contrast, the non-directional DEAD-box protein Ded1 indiscriminately increases unwinding of the duplexes in substrates C and D. Experiments with Ded1 were performed as described in Ref. 44.

**A**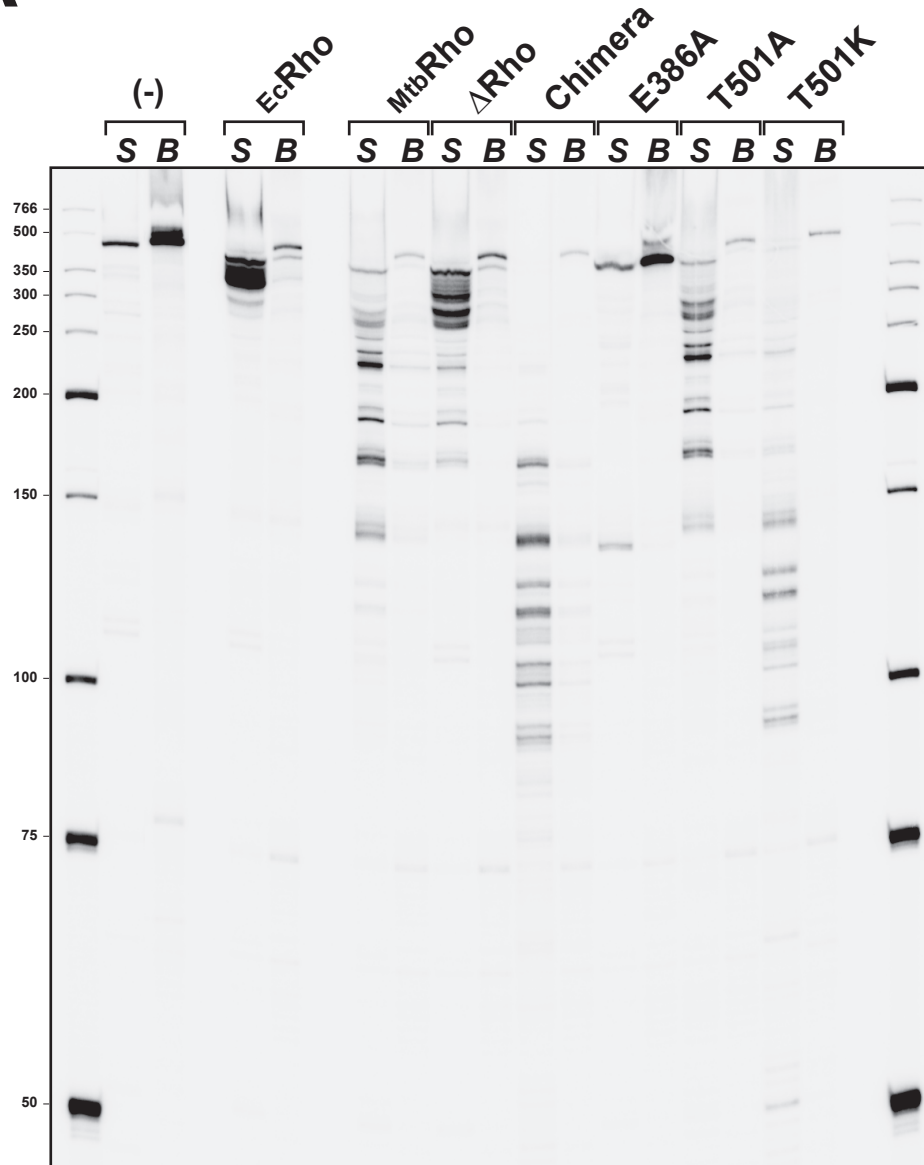**B**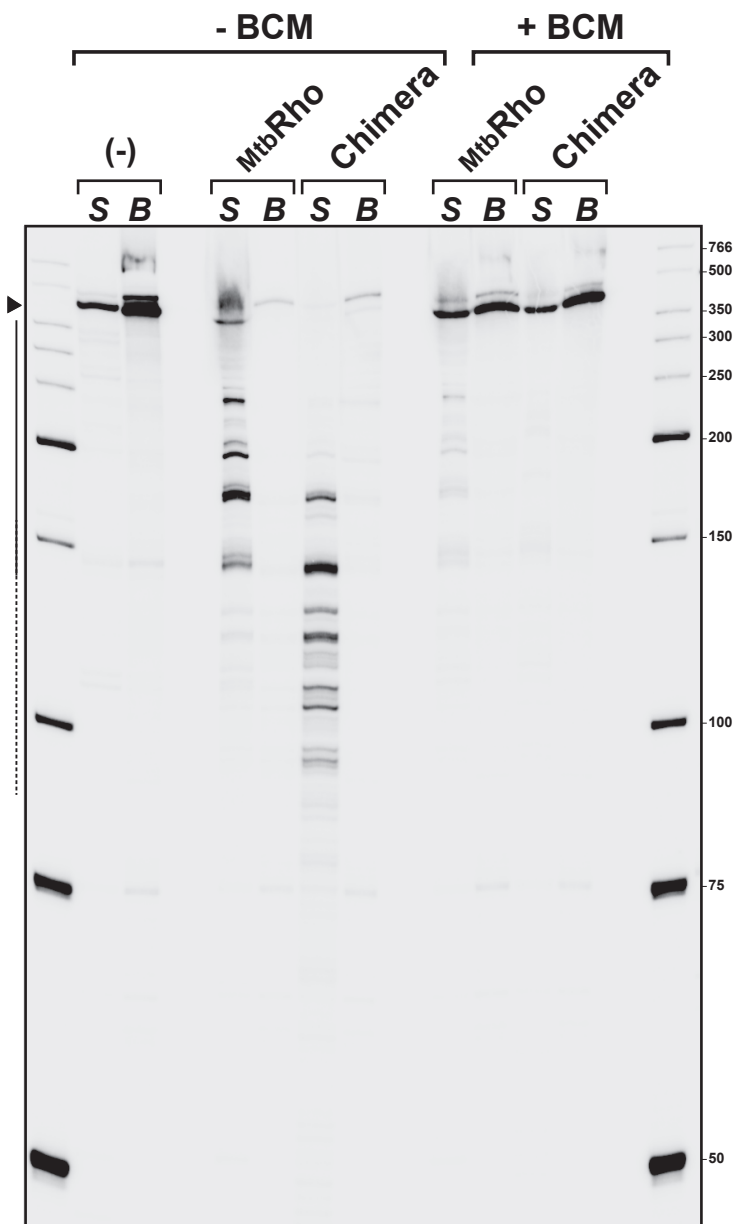

**Supplementary figure 4:** Single-round transcriptions with bead-affixed transcription complexes containing biotinylated  $\lambda$ tR1 DNA templates. The  $^{32}$ P-labeled complexes, halted at +24 (by privation of CTP from the initiation mixture), were immobilized and purified on streptavidin-coated magnetic beads. They were then incubated with the Rho variants indicated above gel lanes before being 'chased' with 75  $\mu$ M rNTPs. The supernatant (S) and bead (B) fractions were then separated on a Magrack (GE-healthcare) before analysis by denaturing PAGE. The presence of the Rho-dependent transcripts in supernatants confirms that they stem from termination rather than transcriptional pausing or arrest. **(A)** Comparison of the RNA release efficiencies of the various Rho proteins. **(B)** Effect of the presence of BCM (0 or 750  $\mu$ M) in reactions performed with the representative WT *Mtb*Rho or the [*Mtb*:Ec]Rho chimera.

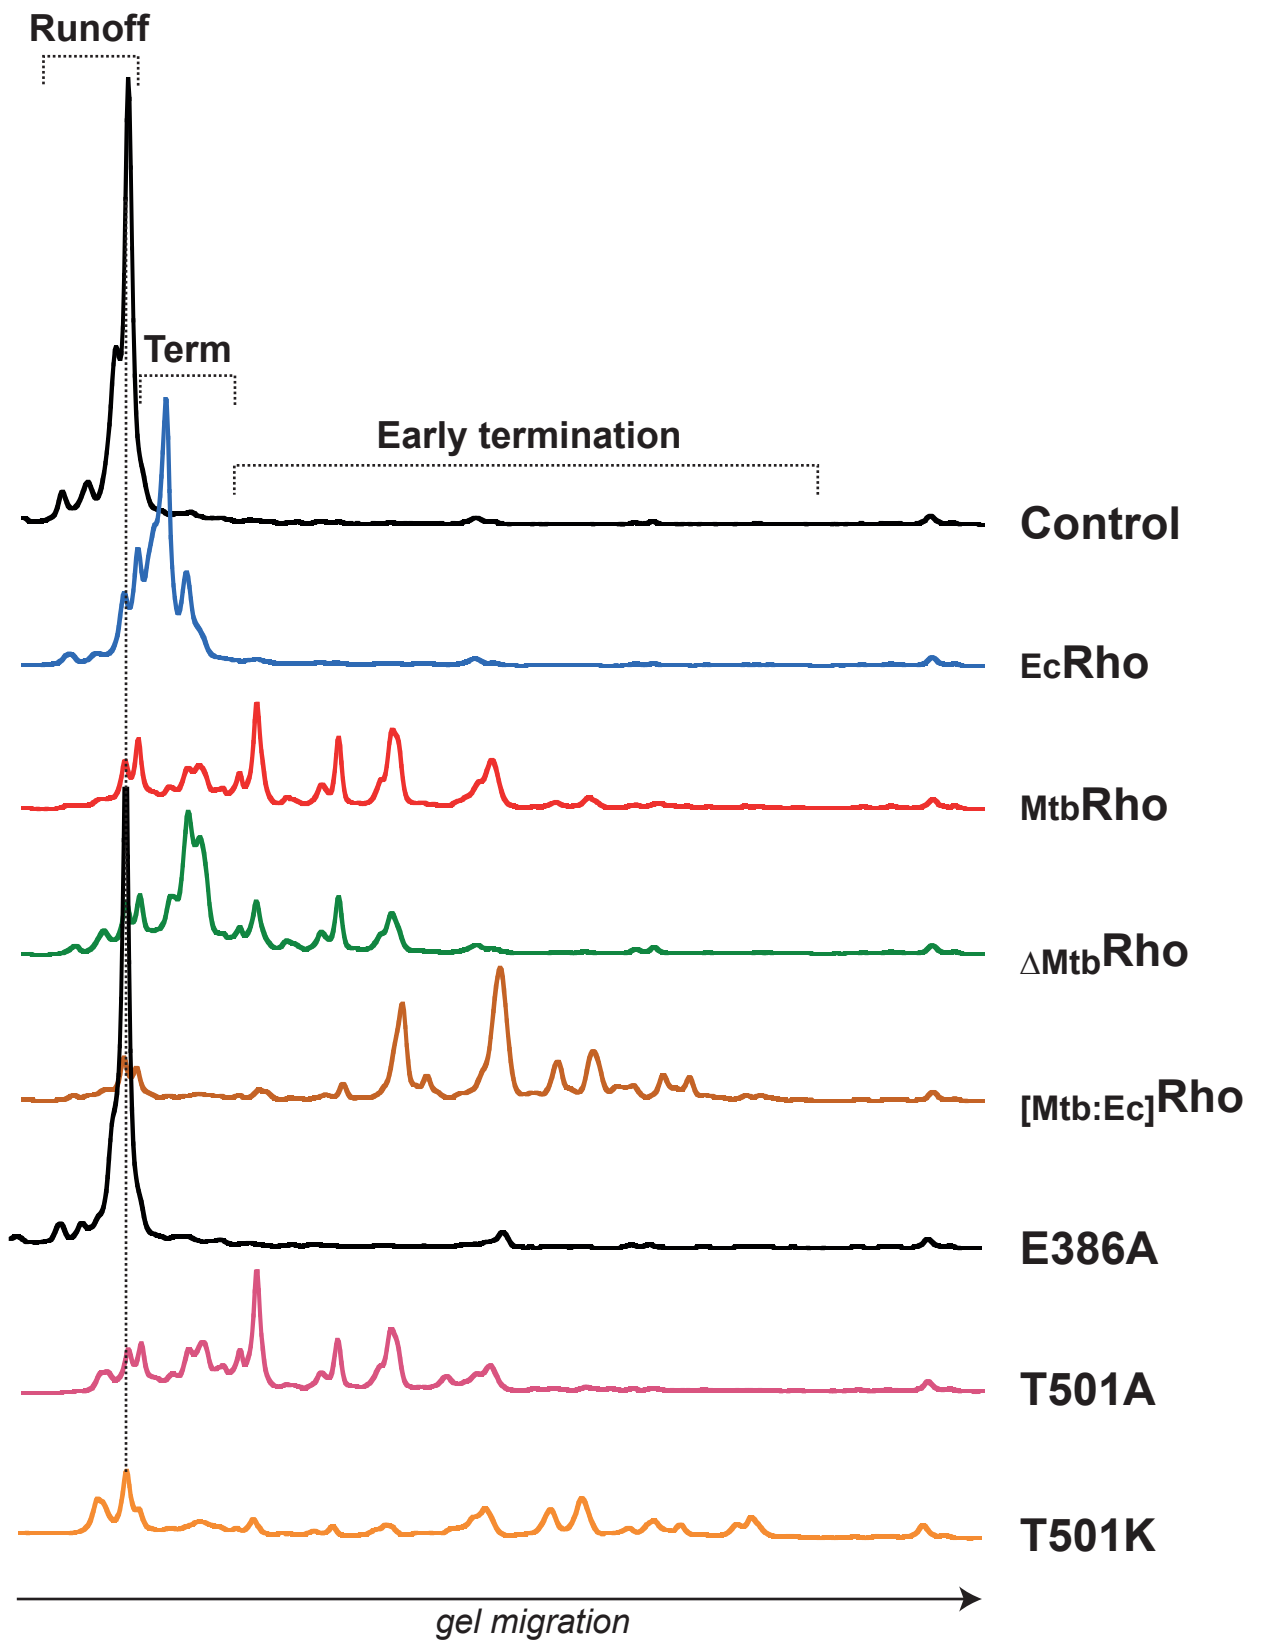

**Supplementary figure 5:** Normalized electrophoregrams of transcription termination reactions performed under standard 'chase' conditions (as in Figure 6B).



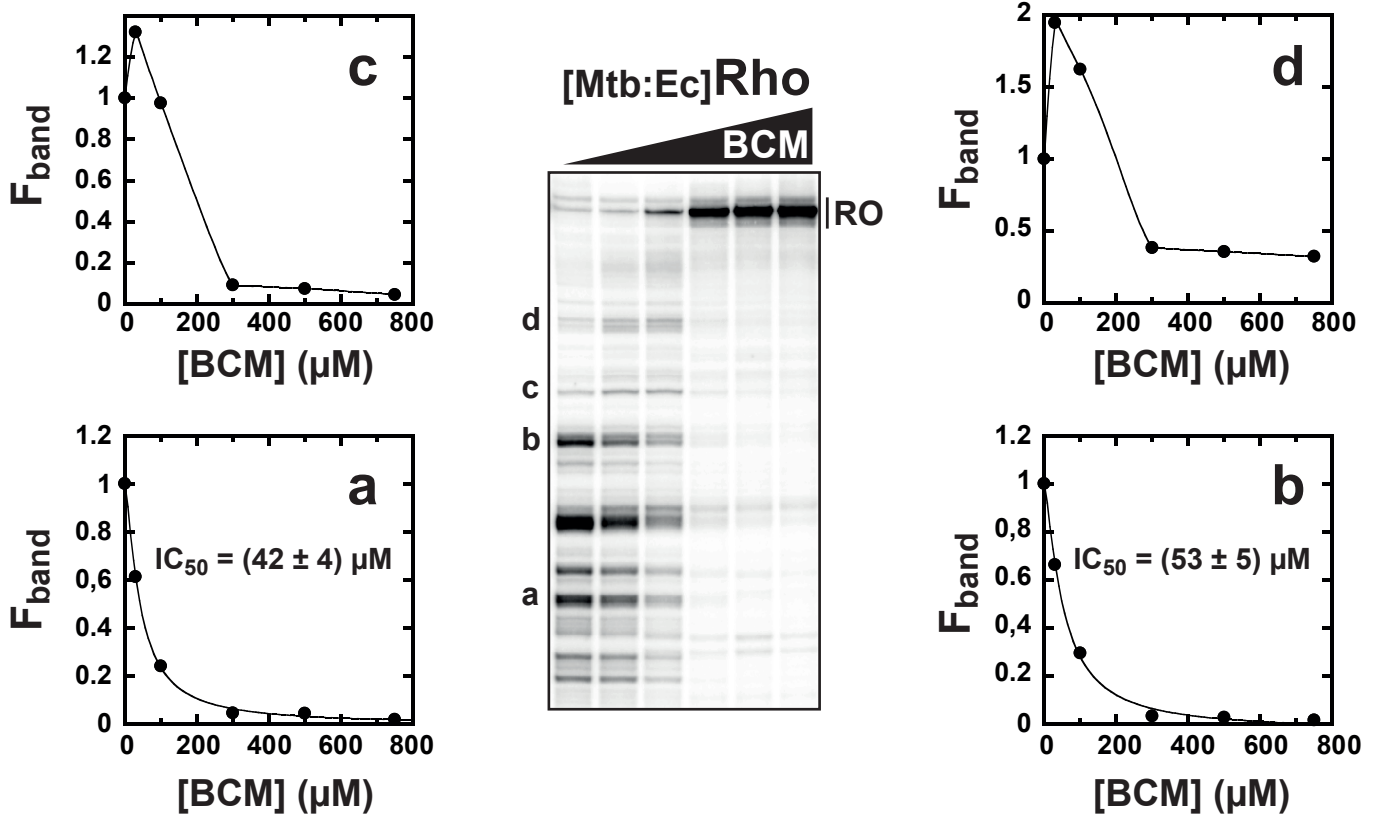

**Supplementary figure 6:** Upstream shift of the termination window obtained with the  $[\text{Mtb:Ec}]\text{Rho}$  chimera as a function of BCM concentration. Graphs show normalized fractions of products released at representative termination positions as a function of BCM concentration (data averaged from 3 independent experiments).

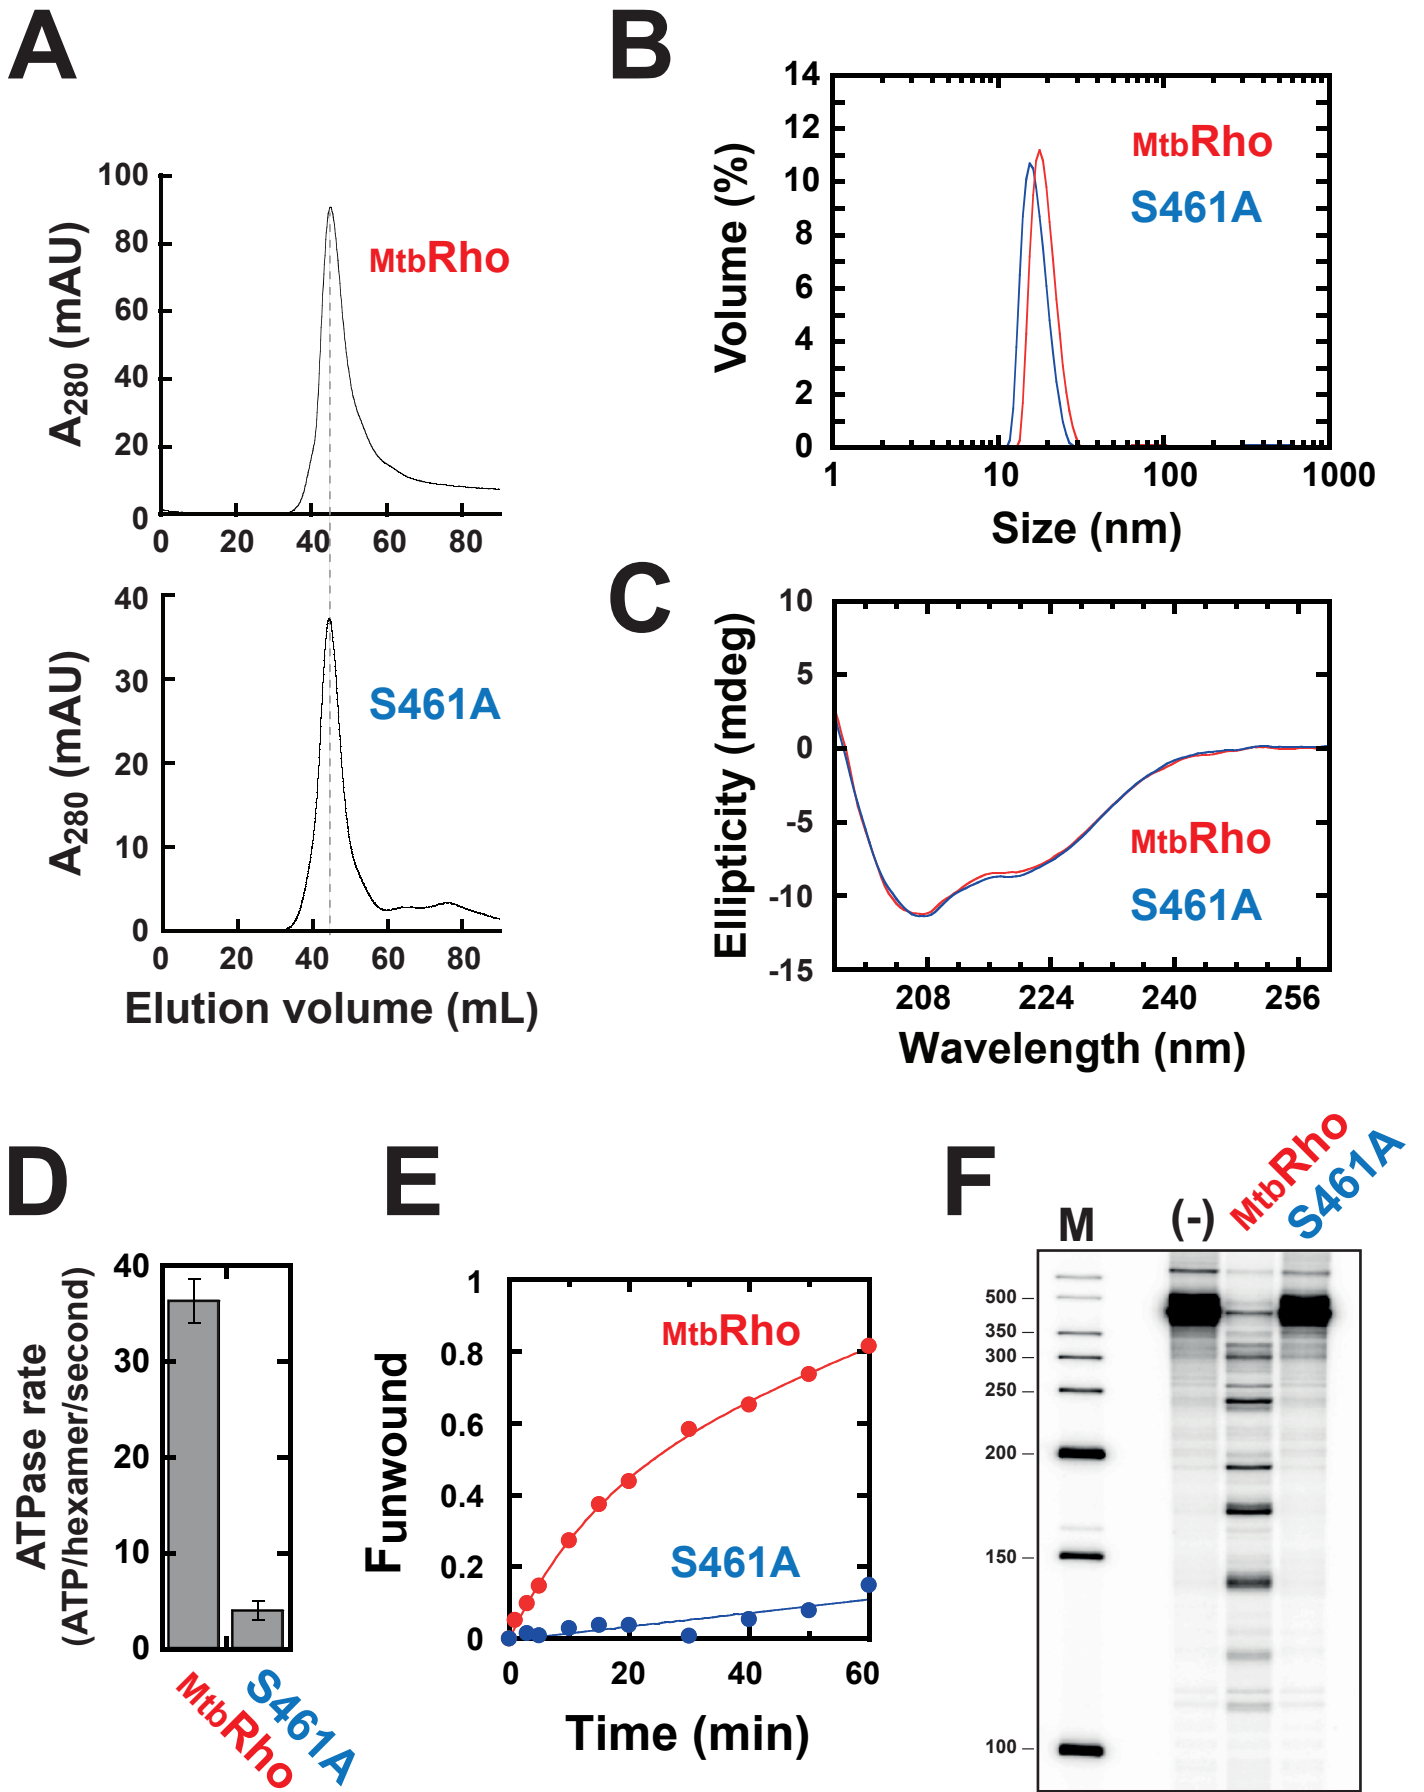

**Supplementary figure 7:** Characterization of the single-point mutant S461A of *MtbRho* by (A) gel filtration on a Sephacryl S-300 HR column, (B) diffusion light scattering, (C) circular dichroism, and (D) steady-state ATP hydrolysis measurements. The Q-loop mutation greatly alters the capacity of *MtbRho* to unwind duplex C (E) or to trigger transcription termination (F). Data for WT *MtbRho* are shown for comparison.
